# Supplementary material for: Effect of patient choice and hospital competition on service configuration and technology adoption within cancer surgery: a national, population-based study
Source: PubMed Central journal article supplement — Lancet Oncol. 2017 Nov;18(11):1445–53. doi: 10.1016/S1470-2045(17)30572-7 (PMC5666166; doi:10.1016/s1470-2045(17)30572-7), 2017-11
Supplement: mmc1.pdf [file mmc1.pdf]

# THE LANCET Oncology

## Supplementary appendix

This appendix formed part of the original submission and has been peer reviewed. We post it as supplied by the authors.

Supplement to: Aggarwal A, Lewis D, Mason M, Purushotham A, Sullivan R, van der Meulen J. Effect of patient choice and hospital competition on service configuration and technology adoption within cancer surgery: a national, population-based study. *Lancet Oncol* 2017; published online Oct 3. [http://dx.doi.org/10.1016/S1470-2045\(17\)30572-7](http://dx.doi.org/10.1016/S1470-2045(17)30572-7).

## **Research in context**

### **Evidence before this study**

Search criteria included: ((patient choice\*[Ti/Abs]) OR consumer choice\*[Ti/Abs]) OR patient preference\*[MeSH Terms]) OR patient preference\*[Ti/Abs]) OR patient mobility[Ti/Abs]) OR patient travel[Ti/Abs]) OR hospital referral\*[MeSH Terms]) OR hospital referral[Ti/Abs])) OR hospital bypassing)) OR hospital choice[Ti/Abs])) OR hospital market[Ti/Abs])) OR hospital competition [Ti/Abs])) AND ((((((health care provider[MeSH Terms]) OR provider\*[Ti/Abs]) OR hospital\*[Ti/Abs]) OR doctor\*[Ti/Abs]) OR Physician\*[Ti/Abs]) OR "specialist care"[Ti/Abs])) AND cancer [Ti/Abs])).
